# Supplementary material
Source: publisher figshare collection journal article supplement (https://frontiersin.figshare.com/ndownloader/files/13708670)
Supplement: Supplementary file 1 [file 13708670]

#NEXUS
[written Sun Jul 29 16:27:37 EEST 2018 by Mesquite  version 3.5 (build 888) at Laurin.local/192.168.1.6 (Michel Laurin)]

BEGIN TAXA;
	TITLE Taxa;
	DIMENSIONS NTAX=48;
	TAXLABELS
		Seymouria Limnoscelis Orobates Edaphosaurus Ianthasaurus Cotylorhynchus Eothyris Oedaleops Eocasea Archaeothyris Archaeovenator Mycterosaurus Captorhinus Rhiodenticulatus Paleothyris Petrolacosaurus Youngina Acerosodontosaurus Protorothyris Araeoscelis Mesosaurus Milleretta Australothyris Microleter Nyctiphruretus Macroleter Bradysaurus Pareiasuchus Scutosaurus Procolophon Owenetta Barasaurus Bashkyroleter_mesensis Bashkyroleter_bashkyricus Nycteroleter Emeroleter Rhipaeosaurus Lanthanosuchus Acleistorhinus Feeserpeton Colobomycter_pholeter Colobomycter_vaughni Delorhynchus_cifellii Abyssomedon Eudibamus Belebey Erpetonyx Bolosaurus_ 
	;

END;


BEGIN CHARACTERS;
	TITLE  'Matrix in file "MacDougall et al. response matrix test.nex"';
	DIMENSIONS  NCHAR=178;
	FORMAT DATATYPE = STANDARD GAP = - MISSING = ? SYMBOLS = "  0 1 2 3";
	CHARSTATELABELS 
		1 narial_shelf,
		2 narial_shelf_composition,
		3 frontal_orbital_contact,
		4 frontal_contribution_to_orbit,
		5 'frontal lateral lappet (7)',
		6 pineal_foramen_position /  displaced_posteriorly in_the_middle_of_the_body_of_the_parietal displaced_anteriorly,
		7 postparietal,
		8 postparietal_number,
		9 postparietal_size,
		10 postparietal_position,
		11 'prefrontal-palatal contact',
		12 'strength of prefrontal-palatal contact',
		13 prefrontal_medial_flange,
		14 prefrontal_orbital_spur,
		15 lacrimal_narial_contact,
		16 foramen_orbitonasale,
		17 foramen_orbitonasale_contributing_elements_,
		18 jugal_anterior_process,
		19 Jugal_suborbital_ramus,
		20 Jugal_contribution_to_temporal_region_of_skull_roof,
		21 'postorbital post process shape (14)',
		22 'po-st contact',
		23 skull_roof_corner,
		24 tabular,
		25 tabular_size,
		26 supratemporal,
		27 supratemporal_size,
		28 'premaxillary dorsal process (1)',
		29 maxilla_antdor_process,
		30 ant_lat_max_foramen_size,
		31 'max-quadratojugal contact',
		32 Suture_between_jugal_and_maxilla,
		33 contact_between_maxilla_and_prefrontal,
		34 contribution_of_maxilla_to_naris,
		35 heterodont_dentition_on_max,
		36 heterodont_dentition_on_dentary,
		37 #_of_enlarged_teeth_on_max,
		38 'sq-PTF contact',
		39 quadratojugal_shape,
		40 quadratojugal_ant._extent,
		41 quadratojugal_ornamentation,
		42 upper_temporal_opening,
		43 lower_temporal_opening,
		44 fenestra_or_emargination,
		45 'l. temp. opening/po contribution (20)',
		46 'l. temp. opening/qj contribution (16)',
		47 region_posterior_to_orbit_length /  shorter_than_anteroposterior_extension_of_orbit equals_anteroposterior_extension_of_orbit longer_than_anteroposterior_extension_of_orbit_,
		48 po_region_ventral_margin,
		49 quadrate_lateral_exposure,
		50 quadrate_anterior_process,
		51 quadrate_condyle_shape,
		52 jaw_articulation_position,
		53 po_extension_of_orbit,
		54 dermal_sculpturing,
		55 dermal_sculpturing_type,
		56 tuburcles_morphology,
		57 dorsal_dermal_ossifications,
		58 posterior_skull_margin_form,
		59 Temporal_notch,
		60 Temporal_depression,
		61 'interpterygoid/palatine relation',
		62 interpterygoid_vacuity_shape,
		63 choana_orientation,
		64 alar_flange,
		65 pterygoid_arcuate_flange,
		66 'cranio-quadrate space',
		67 pterygoid_anterior_extent,
		68 tr._fl._size,
		69 transverse_flange_orientation,
		70 transverse_flange_teeth,
		71 trnasverse_flange_teeth_type,
		72 dentition_on_quadrate_flange_of_pterygoid,
		73 'quad.ram.pterygoid prox. shape (29)',
		74 quadrate_ramus_and_transverse_flange_relationship,
		75 pterygoid_pocket,
		76 ectopterygoid,
		77 ectopterygoid_teeth,
		78 ectoptergoid_cont._to_trans._flange,
		79 suborbital_opening,
		80 basicranial_articulation_mobility,
		81 'basicranial articulation (36)',
		82 parasphenoid_pockets,
		83 #_of_parasphenoid_pockets,
		84 parasphenoid_wings,
		85 cultriform_process,
		86 cultriform_process_length,
		87 parasphenoid_teeth,
		88 parasphenoid_teeth_organization,
		89 supraoccipital_form /  'plate-like, with no sagittal crest' 'plate-like, with a sagittal crest' 'constricted at midline, forming sagittal crest',
		90 paroccipital_process,
		91 'paroccipital process orientation ? (44)',
		92 'pop-skull roof contact',
		93 otic_trough,
		94 inner_ear_medial_wall,
		95 'post-temporal opening',
		96 'post-temporal opening size',
		97 'basisph-basiocc contact',
		98 bo_condyle_shape,
		99 'basioccipital/parasph. ventral exp(37)',
		100 ventral_braincase_tubera,
		101 ventral_braincase_tubera_location,
		102 exoccipital_lateral_flange,
		103 stapes_morphology,
		104 stapedial_dorsal_process,
		105 marginal_dentition,
		106 foramen_intermandibularis,
		107 posterior_intermandibular_foramen_position,
		108 meckelian_fossa_orientation,
		109 fossa_meckelii,
		110 surangular_length,
		111 surangular_accessory_shelf,
		112 paired_surangular_foramina,
		113 coronoid_number,
		114 prearticular_length,
		115 retroarticular_process,
		116 retroarticular_process_size,
		117 retroarticular_process_form,
		118 articular_lateral_shelf,
		119 coronoid_process_size,
		120 coronoid_process_makeup,
		121 splenial,
		122 presacral_vertebral_count,
		123 axial_centrum_orientation,
		124 atlantal_epipophysis_Modest_1999,
		125 axial_intercentrum,
		126 'atlas pc-axial ic fusion',
		127 trunk_neural_arches,
		128 anterior_pc_ventral_surface,
		129 sacral_vertebral_number,
		130 sacral_rib_overlap,
		131 caudal_tr_processes_vs_ribs,
		132 caudal_ribs_form,
		133 caudal_hemal_arches,
		134 interclavicle_morphology,
		135 'interclavicle-clavicle contact',
		136 cleithrum,
		137 cleithrum_relation_to_scapula,
		138 scapula_shape,
		139 supraglenoid_foramen,
		140 glenoid_morphology,
		141 acromion,
		142 sternum_mineralization,
		143 supinator_process_orientation,
		144 parallel_supinator_process_form,
		145 ectepicondylar_morphology,
		146 entepicondylar_foramen,
		147 humerus_morphology /  'short and robust, without a distinct shaft' with_robust_heads_and_a_short_shaft slender_with_long_shaft,
		148 olecranon_process,
		149 olecranon_process_size,
		150 manual_phalangeal_formula,
		151 iliac_dorsolateral_shelf,
		152 iliac_blade,
		153 acetabular_buttress,
		154 femoral_oblique_ventral_ridge,
		155 femoral_proximal_articulation,
		156 femur_greater_trochanter,
		157 femoral_shaft,
		158 astragalus,
		159 astragalus_composition,
		160 'tibio-astragalar joint',
		161 astragalus_and_calcaneum,
		162 medial_centrale_pedis,
		163 distal_tarsal_number,
		164 metapodials,
		165 pedal_phalangeal_formula,
		166 metatarsal_ratios,
		167 #_of_maxillary_teeth,
		168 #_of_premaxillary_teeth,
		169 Single_enlarged_anterior_vomerine_tooth,
		170 Bulbousness_of_marginal_dentition,
		171 LTF_morphology,
		172 Postfrontal_morphology,
		173 Postorbital_bar_thickness,
		174 Squamosal_contribution_to_lower_temporal_bar,
		175 Snout_shape,
		176 Maxilla_lateral_surface_orientation,
		177 Frontal_anterior_process_length,
		178 Posterior_dorsal_neural_spine_orientation /  strongly_posteriorly_inclined approximately_vertical posteriormost_one_or_two_dorsal_neural_spines_anterodorsally_inclined several_posterior_neural_spines_anterodorsally_inclined ; 
	MATRIX
	Seymouria                  0-0-010000100000-00000000000001000011000000---100000012000000000100000000000000001-0000--310000-0000-00100-000000000000-00000000000000000000000-00101000000000---???001200-0--0111
	Limnoscelis                0-0-0001010-0000-1001110000000100010-010000---20000100-0011-000000000020000000000010000-00001?0-0000-0??010100000000000-000011001001?0000000000-000000100000010??0??001100-0--0111
	Orobates                   0-0-000101??0?0??000101000000010001?-010000---10110101010200001?00001000000000000??0000-0001110-0????0??0??001001001000-000011001000???000???00-00000011000000---010000000-0--0111
	Edaphosaurus               0-100001110-1000-0000100101000110011-00101111120011100-0021-000001100000000000000001010-000100100100-000011001000000001100????101?0????00000000-10100?0000?0010?0000??110012111000
	Ianthasaurus               ??1000?111????0???000???????001??0000?01001000????0?00-00???????0??00010000?????????????????????????????0??00100?0???00-?0????10??000????0???1????1???00??????????????2??012111000
	Cotylorhynchus             10100201010-0000-010000010001000000110110010002000?10110021-00??00?0001000?0??000000010-000100100000-0000????100??00000-000000102101000??010000-1010021100100111000121100000000111
	Eothyris                   10100100010-0000-000001010000000000110110010002001?10???021-????0??00010001????001-0????000100100?0??0??0????100??00000-0?????????????????????????????????????????????00?00000011?
	Oedaleops                  1010010001????00-0100000100000?0000?1?11001000200???0101021-????????????????????????????????????????????0?????????????????????????????????????????????????????????????10?01010011?
	Eocasea                    ??????001??????????0?000000???????????11001000?00??101100?1-????????????????????????????0??????????????00????100?????00-?0????1011000?????????????????100???011?0??000???00?00???1
	Archaeothyris              ?????0????????????00????????10?0?0011????01000???????1110?1-????????????????????????????0??????????0-0000?????????????????0???10??0?01????????0-001?????0???1???0?????1??000101011
	Archaeovenator             0-11000?010-0000-0000010100000100011-?1?00100?11???100-0021-????0??00010000010?001-0??0-00??????0??11???0??000001000000-?00000101001000??01000????????000000111001000011?010101012
	Mycterosaurus              0-110001010-0010-1001??????01000000?1011001000101??100-0021-????0????????????????0010010?00???10???0-??00????000?????00-??????10????0????01000?????????????011100?????11?010101012
	Captorhinus                0-1102000110000101001021-010001000000101000---1101010120021-0000100000000001--100001000-22000?110100-00001000000101--00-00100100100100001000001130100000000001100100002100-0--0101
	Rhiodenticulatus           0-1102000110000101001021-0100010000?0101000---2101000120021-0000100010000001--?00001000-22000?110100-00001000??0??1--0??00????00??01000010000011301???00000001100?????2000-0--0101
	Paleothyris                0-10000011????0??01000201010001000010?01000---2?010?0110011-00?010001000???????????100112???????0100-0000????000101--00-?000?0111001000??000001100200000000011100100011100-0--0001
	Petrolacosaurus            0-110100010-000??100012010100010000111??0110011111010100011-00?01??00000000011?00001001120000?110100-0000??00100101--00-1010010010000000100001100020000000001111010101210010101011
	Youngina                   0-110100010-0010-100002010101010100111010110011111010100011-00001000001?000011100001000-22000?110100-0100????1001?00000-?0?00?10101?01001010011100201?0001001111010101100010101011
	Acerosodontosaurus         ??110????????????1100???????10101011-????11001??1?0?01000?1-????????????????????????????????????????????0??????01?00000-?0?0??101???0??0??????111021-00001001?????????2??01010?0?1
	Protorothyris              0-110100110-0000-000012010100011000?1101000---1001010100021-000010000010000010?00001000-2?????110100-0000??00100101--00-1000??111????000100000?????00?????????????????1100-0--1011
	Araeoscelis                0-110?????????0??10001201010001100011?01010---01???100-00?1-????????????????????????????????0???????????0????1001?00000-?00?010010110000?????010002???0001001?????????11?0-0--10?1
	Mesosaurus                 0-110100110-0000-1101110100000100011-00100101101000000-0011-1000000000110001--000010000-00001?11?100-01001001000?000000-0011010010111001-01000101020110000101110010000120010001011
	Milleretta                 0-1101000110001110100110100001100011-0010010000100020100011-0000000000100000101001-10010000000111100-00100-010001000000-0010011011???00010100010101??001??001110010???000000001011
	Australothyris             ?????101011?00?110?00110100?01000?11-?100010010101120100?000100000100010101010?001-0011000000?10?100-0000??00000?10000??0????????????00???????????????????????????????2100100010??
	Microleter                 101?01011110100??010111??00?11100011-?11001101020?020120?000??0?0??01???1??????00????????00?????????????0??00100?000000-??????????????????????????????????????????????2??0-0--101?
	Nyctiphruretus             111100011011101110111110100111101011-0100011110200121100000?0011011010101010101001-1010-210???11?100-0??0???11111001100-10????012111?11??100001000101?01000011110000?01100-0--1011
	Macroleter                 0-110201111110111100111010011100000?10011010111100?11111010010110100001000101?1100011-0-210101110100-101011111101100?0??1011010021???110111?001020101?01100011101110?0110000000011
	Bradysaurus                0-0-02011010000??1001111-001111?0011-000100---1000120111111-1111011010101010101101-1010-210101110100-1?01??111001101?11001?1000021121110111?10112000120110000110111?201100-0--0011
	Pareiasuchus               0-0-02011010000??10011101001110?0011-000100---1000120111111-111101101010?010101101-1010-21010?11?100-1??211111001101?11001????002??2?1?1-11110??210012011001011011????0000-0--0011
	Scutosaurus                0-0-02011010000??1001110100111000011-000100---1000120111111-1111011010101010101101-1010-210101110100-101211111001101?11001?10000?112?1?1-11110112000120110010110111?200000-0--0011
	Procolophon                1110121---11111111011111-00111110011-01000111102001210-000000100011011-01110111001-0010-2101001111010011011111101101101010110?0121010111-11100110010100110?01110011?100010-0--1011
	Owenetta                   101002001011111??1111111-00111100011-01000111102000210-000000000011011-01100111001-1010-21010?11?10100??011111001101101010??0?012100?1?0111?0010?1201?011??01??0?1????1100-0--1011
	Barasaurus                 1010020010??110??0111111-00111100011-01000111102000210-001000000011011-0?100111001-1010-2101??11?10100??0????????????????0110?012100?1101111001001201001?0001???11??001100-0--1011
	Bashkyroleter_mesensis     0-100101?11110111000111010011111?11?-011100---11001?1110?101101101000010000010?101-11-0-??01??11????????0??111101100??????????????????????????????????????????????????1100-0--101?
	Bashkyroleter_bashkyricus  0-1102???111101110001110100?1??1?01?-0??100---100?1?1110?00110?101?0001?1?????110??11-0-??01????????????0??111101100??????????????????????????????????????????????????1100-0--101?
	Nycteroleter               0-1001000111101110001110100111100011-0?1?00-??1000111110010110??0?00001?1?????1101-11-0-???????????0-???0??11110??00????1?????????????????????????????????????????????1100-0--101?
	Emeroleter                 0-1102???11110111010111010011100011?-?11100---1100111110010110??0??0001?0?????1101-11-0-?????????1?0-1??0????110??00?????0????002??????011??10??00201001???011101011001100-0--101?
	Rhipaeosaurus              ???????????????????????????????????????????????????????????????????0001?0?????1?01-1??0-??????????00-???1????110??000????0????0011?????1-1?10?1000100?0111001110101000????????????
	Lanthanosuchus             0-1011010110001??100111010011?10001?-1111010011100100111?11-000001100010111011011001011111010?100010-1??0?????????????????????0??????11??0????????????????????????????2200?010011?
	Acleistorhinus             0-10110101????1??010111010011100101?-1110010111100120100?11-000001000010111010111001011011110?110010-0000????1?0?10000??1?????????????????????????????????????????????11101200101?
	Feeserpeton                ??1111010110100110?11111-00?110?000011100010010100120101?11-?00?01?00011111010?001-1??10111?0?11?110-0000????110?10000??1?????????????????????????????????????????????0?1010?0101?
	Colobomycter_pholeter      111011001110100??0101111-0?1110010001?100010011101?10110?11-10000?100021111010????????10????????????????0??00?00??0100??1?????????????????????????????????????????????00101000101?
	Colobomycter_vaughni       ??101?????????1??0101??1-???11?010001?100010?1??????0110????????????????????????????????????????????????0????100??????????????????????????????????????????????????????10?01000101?
	Delorhynchus_cifellii      111001001110101110001110100111?01111-1110010001100120101?01-1000010000011110001001-10110?1???????????000021001100101000-1?100111????110??0000010102???????????????????11101000101?
	Abyssomedon                ??1?00??????10?11011???????11110??11-?????11?????????1000??????????????????01????1-10010????????????????0????101???????????????????????0?????????????????????1110??????1?0-0--????
	Eudibamus                  0-110?????1110???0?01-2??1-111????11-1?00010110?00?0?0-000?????????121-?1??01??00001??0-??0??????11?????011??????11--?1100???0000?00?11??01?0010312???011011111001000100?00?00???1
	Belebey                    0-1100001111100110001-2011-111000011-10000101101010110-0001-10000?1121-0100010000001000-??00????0????0??01101100111--0111?????00?????????0????10??????01????1?????????00010000101?
	Erpetonyx                  ??110?0011??00?????????0100?1????01?-???0???????0?1??0-00?????0????001??????????????00??00???????????0??0???000???0???0?10?0??1021000??01???????20201?01000111100???000??0???????1
	Bolosaurus_                0-11000011????0??1001?2011-111100011-?0000101101010100-000??10?????????0???????00??000??????????????????0??01???1?????1?0?????00?????????????????02???01????1?????????00?1????????

;

END;
BEGIN MacClade;
	Version 4.0 75;
	LastModified -854829419;
	FileSettings editor '0' '0' '1' '1';
	Singles 000;
	Editor 000110011111111000100 '0' '24' Geneva '9' '100' '1' all;
	EditorPosition '92' '36' '595' '555';
	TreeWindowPosition '40' '2' '1160' '1594';
	ListWindow Characters closed Geneva '9' '50' '10' '265' '443' 00;
	ListWindow Taxa closed Geneva '9' '50' '10' '585' '302' 100;
	ListWindow Trees closed Geneva '9' '50' '10' '276' '490';
	ListWindow TypeSets closed Geneva '9' '50' '10' '276' '490';
	ListWindow WtSets closed Geneva '9' '50' '10' '276' '490';
	ListWindow ExSets closed Geneva '9' '50' '10' '276' '490';
	ListWindow CharSets closed Geneva '9' '50' '10' '276' '490';
	ListWindow TaxSets closed Geneva '9' '50' '10' '276' '490';
	ListWindow NexusBlocks closed Geneva '9' '50' '10' '276' '490';
	ChartWindowPosition '52' '30' '998' '1860';
	StateNamesSymbols closed Geneva '9' '10' '50' '30' '148' '220';
	WindowOrder Data;
	OtherSymbols & / 00 ? -;
	Correlation '0' '0' '1000' '0' '0' 10011010;
	Salmo 00000001;
	EditorFile '2';
	ExportHTML _ MOSS '100' 110000;
	PrettyPrint 10;
	EditorToolsPosition '909' '44' '115' '165';
	TreeWindowProgram 10;
	TreeWindow 0000;
	Continuous '0' '3' 1;
	Calculations 0000001;
	SummaryMode '0' '0' 0;
	Charts Geneva '9' ( normal ) 0010;
	NexusOptions '0' '0' '50' 001011011;
	TipLabel '1';
	TreeFont Geneva '9' ( normal );
	TreeShape 1.0 1.0 0100;
	TraceLabels 0101;
	ChartColors '0' '0' '-1' '9' 11;
	ChartBiggestSpot 1;
	ChartPercent 10;
	ChartBarWidth '10' 1;
	ChartVerticalAxis 10101;
	ChartMinMax '0';
	TraceAllChangesDisplay '1' 1;
	BarsOnBranchesDisplay '0' '0' '-5536' '10000' '10000' '10000' '10000' '-5536' '-536' '-536' '-536' '6' '1' 0000101;
	ContinuousBranchLabels 0;
	AllStatesBranchLabels 1;
	IndexNotation '2' 1;
	PrintTree 10.00 '2' '2' '2' '2' '2' '2' '2' '2' '2' '2' '2' Geneva '9' ( normal ) Geneva '10' ( normal ) Geneva '9' ( normal ) Geneva '9' ( normal ) Geneva '9' ( bold ) Geneva '9' ( normal ) Geneva '9' ( normal ) '0' '0' '0' '0' '0' '0' '0' '0' '0' '0' '0' '0' '0' '0' '0' '0' '0' '0' '0' '0' '0' '0' '0' '0' '0' '0' '0' '0' '0' '0' '1' '1' '1' '1' '2242' '-27056' '-39' '4' '-40' '0' '1' '2' '1' '8' '0' '0' '0' '2' 1000111000000000000100000111000;
	MatchChar 00 .;
	EntryInterpretation 01;
	ColorOptions 0;
	TreeTools '0' '5' '4' '0' '10' '4' '0' 00100111111101110;
	EditorTools '0' '0' '0' '1000' '0' '0' '6' '3' 000001011100001;
	PairAlign '2' '2' '3' '2' '1' '1' '2' '1' '3' 1010;
	BothTools '1';

END;
BEGIN ASSUMPTIONS;
	OPTIONS DEFTYPE = unord PolyTcount = MINSTEPS;
	TYPESET * UNTITLED   =  unord:  1- 5 7- 46 49- 51 53- 68 70- 88 90- 104 106- 128 130- 131 133- 146 148- 149 151- 164 166-169\3 170- 178, ord:  6 47- 48 52 69 89 105 129-132\3 147-150\3 165 167- 168;

	EXSET * UNTITLED  =  42 -  46 171 -  174;

END;

BEGIN MESQUITECHARMODELS;
	ProbModelSet * UNTITLED   =  'Mk1 (est.)':  1- 178;
END;

BEGIN NOTES;

	SUT   TAXON = 7 NAME = color INTEGER = 4;

	SU  T = 13 C = 5 N = color I = 4;

	TEXT   TAXON = 21 CHARACTER = 7 TEXT = changed_from_1;

	TEXT   TAXON = 21 CHARACTER = 8 TEXT = 'changed from -';

	TEXT   TAXON = 21 CHARACTER = 9 TEXT = 'changed from -';

	TEXT   TAXON = 21 CHARACTER = 10 TEXT = 'changed from -';

	TEXT   TAXON = 21 CHARACTER = 15 TEXT = changed_from_1;

	TEXT   TAXON = 21 CHARACTER = 16 TEXT = changed_from_?;

	TEXT   TAXON = 21 CHARACTER = 17 TEXT = changed_from_?;

	TEXT   TAXON = 21 CHARACTER = 18 TEXT = changed_from_0;

	TEXT   TAXON = 21 CHARACTER = 22 TEXT = chnaged_from_0;

	TEXT   TAXON = 21 CHARACTER = 31 TEXT = changed_from_0;

	TEXT   TAXON = 21 CHARACTER = 38 TEXT = changed_from_1;

	TEXT   TAXON = 21 CHARACTER = 40 TEXT = changed_form_0;

	TEXT   TAXON = 21 CHARACTER = 43 TEXT = changed_from_0;

	TEXT   TAXON = 21 CHARACTER = 44 TEXT = 'chanaged from -';

	TEXT   TAXON = 21 CHARACTER = 45 TEXT = 'changed from -';

	TEXT   TAXON = 21 CHARACTER = 46 TEXT = 'changed from -';

	TEXT   TAXON = 21 CHARACTER = 52 TEXT = changed_from_1;

	TEXT   TAXON = 41 CHARACTER = 55 TEXT = 'recoded from 0 by Mark (2015)';

	TEXT   TAXON = 21 CHARACTER = 61 TEXT = changed_from_0;

	TEXT   TAXON = 21 CHARACTER = 65 TEXT = chnaged_from_1;

	TEXT   TAXON = 21 CHARACTER = 66 TEXT = changed_from_?;

	TEXT   TAXON = 21 CHARACTER = 72 TEXT = changed_from_0;

	TEXT   TAXON = 21 CHARACTER = 79 TEXT = changed_from_?;

	TEXT   TAXON = 21 CHARACTER = 84 TEXT = changed_from_1;

	TEXT   TAXON = 21 CHARACTER = 93 TEXT = changed_from_?;

	SU  T = 7 C = 95 N = color I = 4;

	TEXT   TAXON = 21 CHARACTER = 102 TEXT = changed_from_?;

	TEXT   TAXON = 21 CHARACTER = 103 TEXT = changed_from_0;

	TEXT   TAXON = 21 CHARACTER = 106 TEXT = changed_from_?;

	TEXT   TAXON = 21 CHARACTER = 107 TEXT = chnaged_from_?;

	TEXT   TAXON = 21 CHARACTER = 108 TEXT = 'chnaged from -';

	TEXT   TAXON = 21 CHARACTER = 109 TEXT = 'changed from -';

	TEXT   TAXON = 21 CHARACTER = 113 TEXT = chnaged_from_1;

	TEXT   TAXON = 21 CHARACTER = 114 TEXT = chnaged_from_?;

	TEXT   TAXON = 21 CHARACTER = 116 TEXT = chnaged_from_1;

	TEXT   TAXON = 21 CHARACTER = 117 TEXT = chnaged_from_1;

	TEXT   TAXON = 21 CHARACTER = 121 TEXT = chnaged_from_?;

	TEXT   TAXON = 21 CHARACTER = 131 TEXT = changed_from_0;

	TEXT   TAXON = 21 CHARACTER = 136 TEXT = changed_from_0;

	SU  T = 13 C = 137 N = color I = 4;
	SU  T = 14 C = 137 N = color I = 4;
	SU  T = 16 C = 137 N = color I = 4;
	TEXT   TAXON = 21 CHARACTER = 137 TEXT = changed_from_1;

	SU  C = 138 N = color I = 4;
	SU  T = 1 C = 138 N = color I = 4;
	SU  T = 2 C = 138 N = color I = 4;
	SU  T = 3 C = 138 N = color I = 4;
	SU  T = 7 C = 138 N = color I = 4;
	SU  T = 11 C = 138 N = color I = 4;
	SU  T = 13 C = 138 N = color I = 4;
	SU  T = 14 C = 138 N = color I = 4;
	SU  T = 16 C = 138 N = color I = 4;
	SU  T = 17 C = 138 N = color I = 4;
	SU  T = 18 C = 138 N = color I = 4;
	SU  T = 21 C = 138 N = color I = 4;
	SU  T = 22 C = 138 N = color I = 4;
	SU  T = 23 C = 138 N = color I = 4;
	SU  T = 24 C = 138 N = color I = 4;
	SU  T = 25 C = 138 N = color I = 4;
	SU  T = 26 C = 138 N = color I = 4;
	SU  T = 27 C = 138 N = color I = 4;
	SU  T = 28 C = 138 N = color I = 4;
	SU  T = 29 C = 138 N = color I = 4;
	SU  T = 30 C = 138 N = color I = 4;
	SU  T = 31 C = 138 N = color I = 4;
	SU  T = 32 C = 138 N = color I = 4;
	SU  T = 33 C = 138 N = color I = 4;
	SU  T = 34 C = 138 N = color I = 4;
	SU  T = 35 C = 138 N = color I = 4;
	SU  T = 36 C = 138 N = color I = 4;
	SU  T = 37 C = 138 N = color I = 4;
	SU  T = 38 C = 138 N = color I = 4;
	SU  T = 39 C = 138 N = color I = 4;
	SU  T = 40 C = 138 N = color I = 4;
	SU  T = 41 C = 138 N = color I = 4;
	SU  T = 43 C = 138 N = color I = 4;
	SU  T = 44 C = 138 N = color I = 4;
	SU  T = 45 C = 138 N = color I = 4;
	SU  T = 46 C = 138 N = color I = 4;

	TEXT   TAXON = 21 CHARACTER = 148 TEXT = chnaged_from_1;

	TEXT   TAXON = 21 CHARACTER = 149 TEXT = 'changed from -';

	TEXT   TAXON = 21 CHARACTER = 150 TEXT = changed_from_0;

	TEXT   TAXON = 21 CHARACTER = 154 TEXT = changed_from_1;

END;

BEGIN LABELS;
	TAXAGROUPLABEL Parareptile_not_in_Laurin_&_Pineiro_2017 COLOR = (RGB 1 0.10196078 0.10196078) ;


END;

BEGIN SETS;
	TAXPARTITION * UNTITLED  =  Parareptile_not_in_Laurin_&_Pineiro_2017 :  23- 26 32- 38 40- 48;

END;

BEGIN TREES;
	Title Consensus_trees;
	ID CR2P164e4ada9cb3;
	LINK Taxa = Taxa;
	TRANSLATE
[0] 		1 Seymouria,
[1] 		2 Limnoscelis,
[2] 		3 Orobates,
[3] 		4 Edaphosaurus,
[4] 		5 Ianthasaurus,
[5] 		6 Cotylorhynchus,
[6] 		7 Eothyris,
[7] 		8 Oedaleops,
[8] 		9 Eocasea,
[9] 		10 Archaeothyris,
[10] 		11 Archaeovenator,
[11] 		12 Mycterosaurus,
[12] 		13 Captorhinus,
[13] 		14 Rhiodenticulatus,
[14] 		15 Paleothyris,
[15] 		16 Petrolacosaurus,
[16] 		17 Youngina,
[17] 		18 Acerosodontosaurus,
[18] 		19 Protorothyris,
[19] 		20 Araeoscelis,
[20] 		21 Mesosaurus,
[21] 		22 Milleretta,
[22] 		23 Australothyris,
[23] 		24 Microleter,
[24] 		25 Nyctiphruretus,
[25] 		26 Macroleter,
[26] 		27 Bradysaurus,
[27] 		28 Pareiasuchus,
[28] 		29 Scutosaurus,
[29] 		30 Procolophon,
[30] 		31 Owenetta,
[31] 		32 Barasaurus,
[32] 		33 Bashkyroleter_mesensis,
[33] 		34 Bashkyroleter_bashkyricus,
[34] 		35 Nycteroleter,
[35] 		36 Emeroleter,
[36] 		37 Rhipaeosaurus,
[37] 		38 Lanthanosuchus,
[38] 		39 Acleistorhinus,
[39] 		40 Feeserpeton,
[40] 		41 Colobomycter_pholeter,
[41] 		42 Colobomycter_vaughni,
[42] 		43 Delorhynchus_cifellii,
[43] 		44 Abyssomedon,
[44] 		45 Eudibamus,
[45] 		46 Belebey,
[46] 		47 Erpetonyx,
[47] 		48 Bolosaurus_;
	TREE 'Strict consensus, all unordered' = (1,((2,3),(((4,5),(8,(6,7,9))),(10,11,12,(((15,(13,14)),(19,(16,(20,(17,18))))),(21,(22,(23,((40,((38,39),(43,(41,42)))),((47,(45,(46,48))),(24,(((25,44),(30,(31,32))),((27,(28,29)),(26,33,34,35,36,37))))))))))))));
	TREE 'MajRule, all unordered' = (1:50,((2:100,3:100):100[%bootstrapFrequency = 100 ],(((4:100,5:100):100[%bootstrapFrequency = 100 ],(8:100,(6:100,(7:100,9:100):33.333[%bootstrapFrequency = 33.333 ]):100[%bootstrapFrequency = 100 ]):100[%bootstrapFrequency = 100 ]):100[%bootstrapFrequency = 100 ],(10:100,((11:100,12:100):60[%bootstrapFrequency = 60 ],(((15:100,(13:100,14:100):100[%bootstrapFrequency = 100 ]):100[%bootstrapFrequency = 100 ],(19:100,(16:100,(20:100,(17:100,18:100):100[%bootstrapFrequency = 100 ]):100[%bootstrapFrequency = 100 ]):100[%bootstrapFrequency = 100 ]):100[%bootstrapFrequency = 100 ]):100[%bootstrapFrequency = 100 ],(21:100,(22:100,(23:100,((40:100,((38:100,39:100):100[%bootstrapFrequency = 100 ],(43:100,(41:100,42:100):100[%bootstrapFrequency = 100 ]):100[%bootstrapFrequency = 100 ]):100[%bootstrapFrequency = 100 ]):100[%bootstrapFrequency = 100 ],((47:100,(45:100,(46:100,48:100):100[%bootstrapFrequency = 100 ]):100[%bootstrapFrequency = 100 ]):100[%bootstrapFrequency = 100 ],(24:100,(((25:100,44:100):100[%bootstrapFrequency = 100 ],(30:100,(31:100,32:100):100[%bootstrapFrequency = 100 ]):100[%bootstrapFrequency = 100 ]):100[%bootstrapFrequency = 100 ],((27:100,(28:100,29:100):100[%bootstrapFrequency = 100 ]):100[%bootstrapFrequency = 100 ],(34:100,(35:100,(26:100,(33:100,(36:100,37:100):60[%bootstrapFrequency = 60 ]):60[%bootstrapFrequency = 60 ]):80[%bootstrapFrequency = 80 ]):33.333[%bootstrapFrequency = 33.333 ]):100[%bootstrapFrequency = 100 ]):100[%bootstrapFrequency = 100 ]):100[%bootstrapFrequency = 100 ]):100[%bootstrapFrequency = 100 ]):100[%bootstrapFrequency = 100 ]):100[%bootstrapFrequency = 100 ]):100[%bootstrapFrequency = 100 ]):100[%bootstrapFrequency = 100 ]):100[%bootstrapFrequency = 100 ]):100[%bootstrapFrequency = 100 ]):20[%bootstrapFrequency = 20 ]):100[%bootstrapFrequency = 100 ]):100[%bootstrapFrequency = 100 ]):50[%bootstrapFrequency = 0.0 ]);
	TREE 'Strict consensus, some ordered' = (1,((2,3),(((4,5),(8,(6,7,9))),(10,11,12,(((15,(13,14)),(19,(16,(20,(17,18))))),(21,(22,(23,24,47,(45,(46,48)),(40,41,42,43,(38,39)),((25,44),(30,(31,32)),((27,(28,29)),33,34,35,36,37,26))))))))));
	TREE 'MajRule, some ordered' = (1:50,((2:100,3:100)100:100,(((4:100,5:100)100:100,(8:100,(6:100,(7:100,9:100)33.333:33.333)100:100)100:100)100:100,(10:100,((11:100,12:100)60:60,(((15:100,(13:100,14:100)100:100)100:100,(19:100,(16:100,(20:100,(17:100,18:100)100:100)100:100)100:100)100:100)100:100,(21:100,(22:100,(23:100,(47:100,(24:100,((40:100,((38:100,39:100)100:100,(43:100,(41:100,42:100)52.885:52.885)52.885:52.885)52.885:52.885)100:100,((45:100,(46:100,48:100)100:100)100:100,(((25:100,44:100)100:100,(30:100,(31:100,32:100)100:100)100:100)80.769:80.769,((27:100,(28:100,29:100)100:100)100:100,((34:100,35:100)55.769:55.769,(26:100,(33:100,(36:100,37:100)46.154:46.154)57.692:57.692)46.154:46.154)96.154:96.154)100:100)100:100)61.538:61.538)61.538:61.538)61.538:61.538)95.192:95.192)100:100)100:100)100:100)100:100)20:20)100:100)100:100)0:50);
	TREE 'Strict consensus, some ordered, taxa Laurin & Pineiro 2017' = (1,((2,3),(((4,5),(8,(6,7,9))),(10,11,12,((15,19,(13,14),(16,(20,(17,18)))),(21,(22,(39,((30,31),(27,(28,29)))))))))));
	TREE 'MajRule, some ordered, taxa Laurin & Pineiro 2017' = (1:50,((2:100,3:100)100:100,(((4:100,5:100)100:100,(8:100,(6:100,(7:100,9:100)33.333:33.333)100:100)100:100)100:100,((11:100,12:100)50:50,(10:100,(((15:100,(13:100,14:100)100:100)83.333:83.333,(19:100,(16:100,(20:100,(17:100,18:100)100:100)100:100)100:100)83.333:83.333)100:100,(21:100,(22:100,(39:100,((30:100,31:100)100:100,(27:100,(28:100,29:100)100:100)100:100)100:100)100:100)100:100)100:100)100:100)16.667:16.667)100:100)100:100)0:50);

END;


Begin MESQUITE;
		MESQUITESCRIPTVERSION 2;
		TITLE AUTO;
		tell ProjectCoordinator;
		timeSaved 1532870859509;
		getEmployee #mesquite.minimal.ManageTaxa.ManageTaxa;
		tell It;
			setID 0 4460879202308311260;
		endTell;
		getEmployee #mesquite.charMatrices.ManageCharacters.ManageCharacters;
		tell It;
			setID 0 251209751100092182;
			mqVersion 350;
			checksumv 0 3 1071488210 null  getNumChars 178 numChars 178 getNumTaxa 48 numTaxa 48   short true   bits 15   states 15   sumSquaresStatesOnly 14115.0 sumSquares 14115.0 longCompressibleToShort false usingShortMatrix true   NumFiles 1 NumMatrices 1;
			mqVersion;
		endTell;
		getWindow;
		tell It;
			suppress;
			setResourcesState false false 184;
			setPopoutState 300;
			setExplanationSize 0;
			setAnnotationSize 0;
			setFontIncAnnot 0;
			setFontIncExp 0;
			setSize 843 681;
			setLocation 573 48;
			setFont SanSerif;
			setFontSize 10;
			getToolPalette;
			tell It;
			endTell;
			desuppress;
		endTell;
		getEmployee  #mesquite.minimal.ManageTaxa.ManageTaxa;
		tell It;
			showTaxa #4460879202308311260 #mesquite.lists.TaxonList.TaxonList;
			tell It;
				setTaxa #4460879202308311260;
				getWindow;
				tell It;
					useTargetValue off;
					setTargetValue ;
					newAssistant  #mesquite.lists.TaxonListCurrPartition.TaxonListCurrPartition;
					setExplanationSize 30;
					setAnnotationSize 20;
					setFontIncAnnot 0;
					setFontIncExp 0;
					setSize 659 609;
					setLocation 573 48;
					setFont SanSerif;
					setFontSize 10;
					getToolPalette;
					tell It;
					endTell;
				endTell;
				showWindow;
				getEmployee #mesquite.lists.ColorTaxon.ColorTaxon;
				tell It;
					setColor Red;
					removeColor off;
				endTell;
				getEmployee #mesquite.lists.TaxonListAnnotPanel.TaxonListAnnotPanel;
				tell It;
					togglePanel off;
				endTell;
			endTell;
		endTell;
		getEmployee  #mesquite.trees.ManageTrees.ManageTrees;
		tell It;
			showTrees 0 #mesquite.lists.TreesList.TreesList;
			tell It;
				setTreeBlock 1;
				getWindow;
				tell It;
					useTargetValue off;
					setTargetValue ;
					newAssistant  #mesquite.lists.NumForTreeList.NumForTreeList;
				tell It;
					suppress;
					setValueTask  #mesquite.trees.NumberOfTaxa.NumberOfTaxa;
					desuppress;
				endTell;
					newAssistant  #mesquite.lists.TreeListRooted.TreeListRooted;
					newAssistant  #mesquite.lists.TreeListPolys.TreeListPolys;
					newAssistant  #mesquite.lists.TreeListPolyAssumption.TreeListPolyAssumption;
					getTable;
					tell It;
						rowNamesWidth 302;
					endTell;
					popAsTile false;
					popOut;
					setExplanationSize 30;
					setAnnotationSize 20;
					setFontIncAnnot 0;
					setFontIncExp 0;
					setSize 710 342;
					setLocation 686 529;
					setFont SanSerif;
					setFontSize 10;
					getToolPalette;
					tell It;
						setTool mesquite.lists.TreesList.TreesListWindow.arrow;
					endTell;
				endTell;
				showWindow;
			endTell;
		endTell;
		getEmployee  #mesquite.trees.BasicTreeWindowCoord.BasicTreeWindowCoord;
		tell It;
			makeTreeWindow #4460879202308311260  #mesquite.trees.BasicTreeWindowMaker.BasicTreeWindowMaker;
			tell It;
				suppressEPCResponse;
				setTreeSource  #mesquite.trees.StoredTrees.StoredTrees;
				tell It;
					setTreeBlock 1;
					setTreeBlockID CR2P164e4ada9cb3;
					toggleUseWeights off;
				endTell;
				setAssignedID 1924.1532844871099.1805276215481197112;
				getTreeWindow;
				tell It;
					setExplanationSize 30;
					setAnnotationSize 20;
					setFontIncAnnot 0;
					setFontIncExp 0;
					setSize 659 609;
					setLocation 573 48;
					setFont SanSerif;
					setFontSize 10;
					getToolPalette;
					tell It;
						setTool mesquite.trees.BasicTreeWindowMaker.BasicTreeWindow.reroot;
					endTell;
					getTreeDrawCoordinator #mesquite.trees.BasicTreeDrawCoordinator.BasicTreeDrawCoordinator;
				tell It;
					suppress;
					setTreeDrawer  #mesquite.trees.SquareLineTree.SquareLineTree;
					tell It;
						setNodeLocs #mesquite.trees.NodeLocsStandard.NodeLocsStandard;
						tell It;
							branchLengthsToggle off;
							toggleScale on;
							toggleBroadScale off;
							toggleCenter on;
							toggleEven on;
							setFixedTaxonDistance 0;
						endTell;
						setEdgeWidth 4;
						showEdgeLines on;
						orientUp;
					endTell;
					setBackground White;
					setBranchColor Black;
					showNodeNumbers off;
					showBranchColors on;
					labelBranchLengths off;
					centerBrLenLabels on;
					showBrLensUnspecified on;
					showBrLenLabelsOnTerminals on;
					setBrLenLabelColor 0 0 255;
					setNumBrLenDecimals 6;
					desuppress;
					getEmployee #mesquite.trees.BasicDrawTaxonNames.BasicDrawTaxonNames;
					tell It;
						setColor Black;
						toggleColorPartition on;
						toggleColorAssigned off;
						toggleShadePartition off;
						toggleShowFootnotes on;
						toggleNodeLabels on;
						toggleCenterNodeNames off;
						toggleShowNames on;
						namesAngle ?;
					endTell;
				endTell;
					setTreeNumber 6;
					setDrawingSizeMode 0;
					toggleLegendFloat on;
					scale 0;
					toggleTextOnTree off;
					togglePrintName on;
					showWindow;
				endTell;
				desuppressEPCResponse;
				getEmployee #mesquite.trees.ColorBranches.ColorBranches;
				tell It;
					setColor Red;
					removeColor off;
				endTell;
				getEmployee #mesquite.ornamental.BranchNotes.BranchNotes;
				tell It;
					setAlwaysOn off;
				endTell;
				getEmployee #mesquite.ornamental.ColorTreeByPartition.ColorTreeByPartition;
				tell It;
					colorByPartition off;
				endTell;
				getEmployee #mesquite.ornamental.DrawTreeAssocDoubles.DrawTreeAssocDoubles;
				tell It;
					setOn on;
					toggleShow consensusFrequency;
					toggleShow posteriorProbability;
					toggleShow bootstrapFrequency;
					toggleShow consensusFrequency;
					toggleShow posteriorProbability;
					toggleShow bootstrapFrequency;
					setDigits 4;
					setThreshold ?;
					writeAsPercentage off;
					toggleCentred off;
					toggleHorizontal on;
					toggleWhiteEdges on;
					toggleShowOnTerminals on;
					setFontSize 10;
					setOffset 0  0;
				endTell;
				getEmployee #mesquite.ornamental.DrawTreeAssocStrings.DrawTreeAssocStrings;
				tell It;
					setOn on;
					toggleCentred on;
					toggleHorizontal on;
					setFontSize 10;
					setOffset 0  0;
					toggleShowOnTerminals on;
				endTell;
				getEmployee #mesquite.trees.TreeInfoValues.TreeInfoValues;
				tell It;
					panelOpen false;
				endTell;
			endTell;
		endTell;
		getEmployee  #mesquite.charMatrices.BasicDataWindowCoord.BasicDataWindowCoord;
		tell It;
			showDataWindow #251209751100092182 #mesquite.charMatrices.BasicDataWindowMaker.BasicDataWindowMaker;
			tell It;
				getWindow;
				tell It;
					setExplanationSize 30;
					setAnnotationSize 20;
					setFontIncAnnot 0;
					setFontIncExp 0;
					setSize 659 609;
					setLocation 573 48;
					setFont SanSerif;
					setFontSize 10;
					getToolPalette;
					tell It;
						setTool mesquite.stratigraphictools.ColorScaleCells.ColorScaleCells.ColorCells;
					endTell;
					setTool mesquite.stratigraphictools.ColorScaleCells.ColorScaleCells.ColorCells;
					colorCells  #mesquite.charMatrices.NoColor.NoColor;
					colorRowNames  #mesquite.charMatrices.TaxonGroupColor.TaxonGroupColor;
					colorColumnNames  #mesquite.charMatrices.CharGroupColor.CharGroupColor;
					colorText  #mesquite.charMatrices.NoColor.NoColor;
					setBackground White;
					toggleShowNames on;
					toggleShowTaxonNames on;
					toggleTight off;
					toggleThinRows off;
					toggleShowChanges on;
					toggleSeparateLines off;
					toggleShowStates on;
					toggleAutoWCharNames on;
					toggleAutoTaxonNames off;
					toggleShowDefaultCharNames off;
					toggleConstrainCW on;
					toggleBirdsEye off;
					toggleShowPaleGrid off;
					toggleShowPaleCellColors off;
					toggleShowPaleExcluded off;
					togglePaleInapplicable on;
					toggleShowBoldCellText off;
					toggleAllowAutosize on;
					toggleColorsPanel off;
					toggleDiagonal on;
					setDiagonalHeight 80;
					toggleLinkedScrolling on;
					toggleScrollLinkedTables off;
				endTell;
				showWindow;
				getWindow;
				tell It;
					forceAutosize;
				endTell;
				getEmployee #mesquite.charMatrices.AlterData.AlterData;
				tell It;
					toggleBySubmenus off;
				endTell;
				getEmployee #mesquite.charMatrices.ColorByState.ColorByState;
				tell It;
					setStateLimit 9;
					toggleUniformMaximum on;
				endTell;
				getEmployee #mesquite.charMatrices.ColorCells.ColorCells;
				tell It;
					setColor Red;
					removeColor off;
				endTell;
				getEmployee #mesquite.categ.StateNamesEditor.StateNamesEditor;
				tell It;
					makeWindow;
					tell It;
						setExplanationSize 30;
						setAnnotationSize 20;
						setFontIncAnnot 0;
						setFontIncExp 0;
						setSize 659 609;
						setLocation 573 48;
						setFont SanSerif;
						setFontSize 10;
						getToolPalette;
						tell It;
							setTool mesquite.categ.StateNamesEditor.StateNamesWindow.ibeam;
						endTell;
						rowsAreCharacters on;
						toggleConstrainChar on;
						toggleConstrainCharNum 3;
						togglePanel off;
						toggleSummaryPanel off;
					endTell;
					showWindow;
				endTell;
				getEmployee #mesquite.categ.StateNamesStrip.StateNamesStrip;
				tell It;
					showStrip off;
				endTell;
				getEmployee #mesquite.charMatrices.AnnotPanel.AnnotPanel;
				tell It;
					togglePanel off;
				endTell;
				getEmployee #mesquite.charMatrices.CharReferenceStrip.CharReferenceStrip;
				tell It;
					showStrip off;
				endTell;
				getEmployee #mesquite.charMatrices.QuickKeySelector.QuickKeySelector;
				tell It;
					autotabOff;
				endTell;
				getEmployee #mesquite.charMatrices.SelSummaryStrip.SelSummaryStrip;
				tell It;
					showStrip off;
				endTell;
				getEmployee #mesquite.stratigraphictools.ColorScaleCells.ColorScaleCells;
				tell It;
					setColor Red;
					removeColor off;
				endTell;
				getEmployee #mesquite.categ.SmallStateNamesEditor.SmallStateNamesEditor;
				tell It;
					panelOpen true;
				endTell;
			endTell;
		endTell;
		getEmployee  #mesquite.charMatrices.ManageCharacters.ManageCharacters;
		tell It;
			showCharacters #251209751100092182 #mesquite.lists.CharacterList.CharacterList;
			tell It;
				setData 0;
				getWindow;
				tell It;
					useTargetValue off;
					setTargetValue ;
					newAssistant  #mesquite.lists.DefaultCharOrder.DefaultCharOrder;
					newAssistant  #mesquite.lists.CharListInclusion.CharListInclusion;
					newAssistant  #mesquite.lists.CharListPartition.CharListPartition;
					newAssistant  #mesquite.parsimony.CharListParsModels.CharListParsModels;
					newAssistant  #mesquite.lists.CharNumForList.CharNumForList;
				tell It;
					suppress;
					setValueTask  #mesquite.categ.NumberOfStates.NumberOfStates;
					toggleShadeCells off;
					desuppress;
				endTell;
					getTable;
					tell It;
						columnWidth 1 71;
					endTell;
					setExplanationSize 30;
					setAnnotationSize 20;
					setFontIncAnnot 0;
					setFontIncExp 0;
					setSize 659 609;
					setLocation 573 48;
					setFont SanSerif;
					setFontSize 10;
					getToolPalette;
					tell It;
						setTool mesquite.lists.CharacterList.CharacterListWindow.arrow;
					endTell;
					setActive;
				endTell;
				showWindow;
				getEmployee #mesquite.lists.CharListAnnotPanel.CharListAnnotPanel;
				tell It;
					togglePanel off;
				endTell;
			endTell;
		endTell;
		endTell;
end;
